# Supplementary material
Source: PubMed Central journal article supplement (PMC8989767)
Supplement: NIHMS1739782-supplement-1.pdf [file NIHMS1739782-supplement-1.pdf]

Supplemental Table S1: Inpatient Admissions and Emergency Room Visits Among Medicare Beneficiaries Residing in Assisted Living Communities: by Race/Ethnicity and Dual Status

| VARIABLES                    | Inpatient Admissions<br>Odds Ratio (SE) |                        |                        | Emergency Room Visits<br>Odds Ratio (SE) |                        |                        |
|------------------------------|-----------------------------------------|------------------------|------------------------|------------------------------------------|------------------------|------------------------|
|                              | Base Model                              | Adjusted               | Adjusted+Fixed Effects | Base Model                               | Adjusted               | Adjusted+Fixed Effects |
| Ref: White Non-Dual          |                                         |                        |                        |                                          |                        |                        |
| White Dual                   | 1.401***<br>(0.0227)                    | 1.017<br>(0.0182)      | 1.030<br>(0.0235)      | 1.584***<br>(0.0239)                     | 1.253***<br>(0.0206)   | 1.117***<br>(0.0233)   |
| Black Non-Dual               | 0.668***<br>(0.0221)                    | 0.930**<br>(0.0322)    | 0.892***<br>(0.0372)   | 0.685***<br>(0.0203)                     | 1.078**<br>(0.0337)    | 1.037<br>(0.0396)      |
| Black Dual                   | 1.315***<br>(0.0435)                    | 0.937*<br>(0.0336)     | 0.906**<br>(0.0390)    | 1.537***<br>(0.0468)                     | 1.304***<br>(0.0457)   | 1.140***<br>(0.0453)   |
| Hispanic Non-Dual            | 0.583***<br>(0.0262)                    | 0.956<br>(0.0452)      | 1.012<br>(0.0559)      | 0.516***<br>(0.0187)                     | 0.877***<br>(0.0331)   | 0.981<br>(0.0439)      |
| Hispanic Dual                | 1.490***<br>(0.0552)                    | 1.055<br>(0.0417)      | 1.044<br>(0.0521)      | 1.380***<br>(0.0485)                     | 1.078*<br>(0.0427)     | 1.215***<br>(0.0595)   |
| Age                          |                                         | 1.007***<br>(0.000742) | 1.006***<br>(0.000821) |                                          | 1.008***<br>(0.000651) | 1.007***<br>(0.000726) |
| Female (ref: Male)           |                                         | 1.043***<br>(0.0128)   | 1.041***<br>(0.0136)   |                                          | 1.106***<br>(0.0120)   | 1.095***<br>(0.0126)   |
| Number of chronic conditions |                                         | 1.110***<br>(0.00273)  | 1.113***<br>(0.00292)  |                                          | 1.103***<br>(0.00256)  | 1.106***<br>(0.00271)  |
| Diagnoses (1):               |                                         |                        |                        |                                          |                        |                        |
| ADRD                         |                                         | 1.358***<br>(0.0155)   | 1.369***<br>(0.0168)   |                                          | 1.321***<br>(0.0133)   | 1.347***<br>(0.0144)   |
| COPD                         |                                         | 1.176***<br>(0.0133)   | 1.177***<br>(0.0142)   |                                          | 1.111***<br>(0.0113)   | 1.099***<br>(0.0119)   |
| CHF                          |                                         | 1.436***<br>(0.0172)   | 1.449***<br>(0.0184)   |                                          | 1.207***<br>(0.0131)   | 1.201***<br>(0.0137)   |
| Diabetes                     |                                         | 0.878***<br>(0.0100)   | 0.872***<br>(0.0106)   |                                          | 0.875***<br>(0.00892)  | 0.879***<br>(0.00954)  |
| Mobility impairment          |                                         | 0.953***<br>(0.0153)   | 0.942***<br>(0.0162)   |                                          | 0.893***<br>(0.0138)   | 0.882***<br>(0.0145)   |
| Atrial fibrillation          |                                         | 1.245***<br>(0.0139)   | 1.241***<br>(0.0147)   |                                          | 1.160***<br>(0.0123)   | 1.154***<br>(0.0128)   |
| Cataracts                    |                                         | 0.707***<br>(0.0114)   | 0.704***<br>(0.0124)   |                                          | 0.831***<br>(0.0120)   | 0.821***<br>(0.0128)   |
| Chronic kidney disease       |                                         | 1.638***<br>(0.0190)   | 1.633***<br>(0.0201)   |                                          | 1.296***<br>(0.0132)   | 1.274***<br>(0.0137)   |
| Ischemic heart disease       |                                         | 1.018                  | 1.003                  |                                          | 1.021*                 | 1.033***               |

|                             |         |           |           |         |           |           |
|-----------------------------|---------|-----------|-----------|---------|-----------|-----------|
|                             |         | (0.0137)  | (0.0142)  |         | (0.0115)  | (0.0124)  |
| Osteoporosis                |         | 0.968***  | 0.969**   |         | 0.946***  | 0.958***  |
|                             |         | (0.0117)  | (0.0124)  |         | (0.0101)  | (0.0108)  |
| Rheumatoid arthritis        |         | 0.890***  | 0.897***  |         | 1.058***  | 1.071***  |
|                             |         | (0.0135)  | (0.0145)  |         | (0.0137)  | (0.0148)  |
| Stroke (in CY2018)          |         | 2.540***  | 2.576***  |         | 2.285***  | 2.326***  |
|                             |         | (0.0437)  | (0.0471)  |         | (0.0413)  | (0.0443)  |
| Cancer                      |         | 1.000     | 1.000     |         | 0.967***  | 0.968***  |
|                             |         | (0.0121)  | (0.0127)  |         | (0.0104)  | (0.0110)  |
| Anemia                      |         | 1.313***  | 1.283***  |         | 1.083***  | 1.099***  |
|                             |         | (0.0211)  | (0.0217)  |         | (0.0135)  | (0.0145)  |
| Hypertension                |         | 1.305***  | 1.227***  |         | 1.226***  | 1.166***  |
|                             |         | (0.0367)  | (0.0363)  |         | (0.0238)  | (0.0244)  |
| Hypotension                 |         | 0.857***  | 0.869***  |         | 0.890***  | 0.910***  |
|                             |         | (0.00910) | (0.00988) |         | (0.00849) | (0.00919) |
| Anxiety/depression          |         | 0.945***  | 0.929***  |         | 1.043***  | 1.026**   |
|                             |         | (0.0130)  | (0.0136)  |         | (0.0123)  | (0.0128)  |
| Mental illness (2)          |         | 0.828***  | 0.830***  |         | 0.876***  | 0.873***  |
|                             |         | (0.0117)  | (0.0127)  |         | (0.0116)  | (0.0123)  |
| Drug abuse                  |         | 0.856***  | 0.851***  |         | 0.882***  | 0.853***  |
|                             |         | (0.0173)  | (0.0185)  |         | (0.0169)  | (0.0174)  |
| Obesity                     |         | 0.976**   | 0.968**   |         | 0.954***  | 0.937***  |
|                             |         | (0.0118)  | (0.0126)  |         | (0.0106)  | (0.0111)  |
| Peripheral vascular disease |         | 1.001     | 0.986     |         | 0.976**   | 0.998     |
|                             |         | (0.0113)  | (0.0119)  |         | (0.00994) | (0.0110)  |
| Number of Observations      | 255,564 | 255,564   | 230,547   | 255,564 | 255,564   | 239,191   |

Note: \*\*\*p<0.01, \*\*p<0.05, \*p<0.1  
Clustered standard error in parentheses

- (1) Unless otherwise noted chronic conditions refer to diagnoses ever made.
- (2) Schizophrenia, psychosis, bipolar disorders.

Supplemental Table S2: Nursing Home Placement and 30-Day Hospital Readmission Among Medicare Beneficiaries Residing in Assisted Living Communities: by Race/Ethnicity and Dual Status

| VARIABLES                    | Nursing Home Placement<br>Odds Ratio (SE) |                       |                        | 30 Day Hospital Readmission<br>Odds Ratio (SE) |                       |                        |
|------------------------------|-------------------------------------------|-----------------------|------------------------|------------------------------------------------|-----------------------|------------------------|
|                              | Base Model                                | Adjusted              | Adjusted+Fixed Effects | Base Model                                     | Adjusted              | Adjusted+Fixed Effects |
| Ref: White Non-Dual          |                                           |                       |                        |                                                |                       |                        |
| White Dual                   | 3.224***<br>(0.0893)                      | 2.379***<br>(0.0763)  | 1.544***<br>(0.0676)   | 1.159***<br>(0.0303)                           | 0.846***<br>(0.0253)  | 0.854***<br>(0.0381)   |
| Black Non-Dual               | 0.936<br>(0.0698)                         | 1.232***<br>(0.0936)  | 1.355***<br>(0.128)    | 1.067<br>(0.0724)                              | 0.949<br>(0.0660)     | 0.989<br>(0.0879)      |
| Black Dual                   | 3.088***<br>(0.162)                       | 2.208***<br>(0.125)   | 1.604***<br>(0.118)    | 1.296***<br>(0.0724)                           | 0.866**<br>(0.0522)   | 0.854*<br>(0.0709)     |
| Hispanic Non-Dual            | 0.602***<br>(0.0704)                      | 0.837<br>(0.0993)     | 1.084<br>(0.147)       | 1.124<br>(0.102)                               | 1.041<br>(0.0948)     | 0.973<br>(0.112)       |
| Hispanic Dual                | 2.579***<br>(0.186)                       | 1.703***<br>(0.126)   | 1.648***<br>(0.145)    | 1.600***<br>(0.101)                            | 1.124*<br>(0.0728)    | 1.108<br>(0.101)       |
| Age                          |                                           | 1.005***<br>(0.00145) | 1.009***<br>(0.00169)  |                                                | 0.986***<br>(0.00132) | 0.988***<br>(0.00161)  |
| Female (ref: Male)           |                                           | 0.986<br>(0.0227)     | 0.986<br>(0.0251)      |                                                | 0.900***<br>(0.0202)  | 0.902***<br>(0.0229)   |
| Number of chronic conditions |                                           | 1.001<br>(0.00375)    | 1.011***<br>(0.00412)  |                                                | 1.035***<br>(0.00440) | 1.032***<br>(0.00501)  |
| Diagnoses (1):               |                                           |                       |                        |                                                |                       |                        |
| ADRD                         |                                           | 2.682***<br>(0.0793)  | 2.901***<br>(0.0905)   |                                                | 1.101***<br>(0.0245)  | 1.116***<br>(0.0281)   |
| COPD                         |                                           | 0.990<br>(0.0244)     | 0.976<br>(0.0264)      |                                                | 1.102***<br>(0.0239)  | 1.101***<br>(0.0270)   |
| CHF                          |                                           | 1.172***<br>(0.0307)  | 1.145***<br>(0.0323)   |                                                | 1.244***<br>(0.0303)  | 1.240***<br>(0.0338)   |
| Diabetes                     |                                           | 1.030<br>(0.0251)     | 1.053*<br>(0.0285)     |                                                | 0.952**<br>(0.0205)   | 0.948**<br>(0.0227)    |
| Mobility impairment          |                                           | 1.258***<br>(0.0370)  | 1.344***<br>(0.0445)   |                                                | 1.026<br>(0.0273)     | 1.022<br>(0.0310)      |
| Atrial fibrillation          |                                           |                       |                        |                                                | 1.168***<br>(0.0243)  | 1.181***<br>(0.0274)   |
| Cataracts                    |                                           |                       |                        |                                                | 0.901***              | 0.903***               |

|                             |          |          |         |        |          |          |
|-----------------------------|----------|----------|---------|--------|----------|----------|
|                             |          |          |         |        | (0.0270) | (0.0320) |
| Chronic kidney disease      | 1.182*** | 1.164*** |         |        | 1.300*** | 1.308*** |
|                             | (0.0307) | (0.0325) |         |        | (0.0316) | (0.0357) |
| Ischemic heart disease      | 0.925*** | 0.900*** |         |        | 1.058**  | 1.047    |
|                             | (0.0275) | (0.0287) |         |        | (0.0299) | (0.0335) |
| Osteoporosis                |          |          |         |        | 0.978    | 0.990    |
|                             |          |          |         |        | (0.0223) | (0.0252) |
| Rheumatoid arthritis        | 1.030    | 1.020    |         |        | 0.923**  | 0.883*** |
|                             | (0.0341) | (0.0366) |         |        | (0.0288) | (0.0315) |
| Stroke (in CY2018)          | 1.689*** | 1.671*** |         |        | 1.321*** | 1.355*** |
|                             | (0.0515) | (0.0573) |         |        | (0.0345) | (0.0400) |
| Cancer                      |          |          |         |        | 1.019    | 1.006    |
|                             |          |          |         |        | (0.0231) | (0.0254) |
| Anemia                      |          |          |         |        | 1.237*** | 1.233*** |
|                             |          |          |         |        | (0.0458) | (0.0510) |
| Hypertension                |          |          |         |        | 0.941    | 0.955    |
|                             |          |          |         |        | (0.0631) | (0.0746) |
| Hypotension                 |          |          |         |        | 0.977    | 0.975    |
|                             |          |          |         |        | (0.0202) | (0.0226) |
| Anxiety/depression          | 1.503*** | 1.506*** |         |        | 0.969    | 0.961    |
|                             | (0.0507) | (0.0530) |         |        | (0.0266) | (0.0294) |
| Mental illness (2)          | 1.313*** | 1.290*** |         |        | 1.011    | 1.017    |
|                             | (0.0352) | (0.0389) |         |        | (0.0257) | (0.0293) |
| Drug abuse                  |          |          |         |        | 1.037    | 1.028    |
|                             |          |          |         |        | (0.0342) | (0.0386) |
| Obesity                     | 1.173*** | 1.146*** |         |        | 1.002    | 1.007    |
|                             | (0.0286) | (0.0308) |         |        | (0.0225) | (0.0255) |
| Peripheral vascular disease | 1.305*** | 1.277*** |         |        | 0.947**  | 0.964    |
|                             | (0.0354) | (0.0370) |         |        | (0.0206) | (0.0242) |
| Hip fracture (CY2018)       | 2.955*** | 3.022*** |         |        |          |          |
|                             | (0.118)  | (0.139)  |         |        |          |          |
| Pressure ulcers (CY2018)    | 1.969*** | 2.212*** |         |        |          |          |
|                             | (0.0499) | (0.0627) |         |        |          |          |
| Number of Observations      | 255,564  | 255,564  | 139,625 | 79,952 | 79,952   | 59,839   |

Note: \*\*\*p<0.01, \*\*p<0.05, \*p<0.1  
Clustered standard error in parentheses

- (1) Unless otherwise noted chronic conditions refer to diagnoses ever made.
- (2) Schizophrenia, psychosis, bipolar disorder
